# Supplementary material
Source: MDPI journal article supplement (https://www.mdpi.com/2073-8994/11/9/1129)
Supplement: s1 [file s1]

# Olfactory Laterality Is Valence-Dependent in Mice

Christelle Jozet-Alves <sup>1,\*</sup>, Solenn Percelay <sup>2</sup> and Valentine Bouet <sup>2</sup>

<sup>1</sup> Normandie Univ, UNICAEN, University of Rennes, CNRS, UMR EthoS 6552, 14000 Caen, France

<sup>2</sup> Normandie Univ, UNICAEN, INSERM, COMETE, GIP CYCERON, 14000 Caen, France

\* Correspondence: christelle.alves@unicaen.fr

## Supplementary Data

**Table S1.** Proportion of mice using their right nostril first compared to random nostril use (50%) in NMRI mice: Confidence intervals (CI) and odds ratio (Binomial tests).

| Odour   | CI   |      | Odds ratio |
|---------|------|------|------------|
| Female  | 0.36 | 0.81 | 1.5        |
| Vanilla | 0.36 | 0.81 | 1.5        |
| Water   | 0.41 | 0.85 | 0.54       |
| Garlic  | 0.41 | 0.85 | 0.54       |
| Rat     | 0.41 | 0.85 | 0.54       |

**Table S2.** Proportion of mice using their right nostril first compared to random nostril use (50%) in C57BL/6J mice: Confidence intervals (CI) and odds ratio (Binomial tests).

| Odour   | CI   |      | Odds ratio |
|---------|------|------|------------|
| Female  | 0.32 | 0.78 | 1.37       |
| Vanilla | 0.36 | 0.81 | 1.5        |
| Water   | 0.27 | 0.73 | 1          |
| Garlic  | 0.27 | 0.73 | 1          |
| Rat     | 0.41 | 0.85 | 0.54       |

**Table S3.** Comparisons of first nostril used for each odour in both strain (Cochran test): effect size (maximum-corrected measure of effect size:  $\eta^2Q$ ).

| Strain   | $\eta^2Q$ |
|----------|-----------|
| NMRI     | 0.07      |
| C57BL/6J | 0.05      |

**Table S4.** Comparisons to Chance levels (0) for each odour in NMRI mice: Confidence intervals (CI) and effect size (Cohen's  $d$ ; one-sample t-tests).

| Odour   | CI    |       | Cohen's $d$ |
|---------|-------|-------|-------------|
| Female  | 0.10  | 0.52  | 0.15        |
| Vanilla | -0.10 | 0.25  | 0.22        |
| Water   | -0.23 | 0.19  | 0.05        |
| Garlic  | -0.30 | 0.02  | 0.40        |
| Rat     | -0.59 | -0.03 | 0.84        |

**Table S5.** Comparisons to Chance levels (0) for each odour in C57BL/6J mice: Confidence intervals (CI) and effect size (Cohen's  $d$ ; one-sample t-tests).

| Odour   | CI   |      | Cohen's $d$ |
|---------|------|------|-------------|
| Female  | 0.17 | 0.63 | 0.90        |
| Vanilla | 0    | 0.39 | 0.47        |

|        |       |       |      |
|--------|-------|-------|------|
| Water  | -0.27 | 0.14  | 0.15 |
| Garlic | -0.31 | 0.09  | 0.25 |
| Rat    | -0.73 | -0.16 | 1.06 |

**Table S6.** Comparisons of mean LI for each odour between strains: Confidence intervals (CI) and effect size (Cohen's d) for Welch two-samples t-tests.

| Odour   | CI    |      | Cohen's d |
|---------|-------|------|-----------|
| Female  | -0.21 | 0.38 | 0.23      |
| Vanilla | -0.14 | 0.37 | 0.29      |
| Water   | -0.33 | 0.24 | 0.12      |
| Garlic  | -0.22 | 0.28 | 0.07      |
| Rat     | -0.50 | 0.24 | 0.27      |

**Table S7.** Comparisons of mean absLI for each odour between strains: Confidence intervals (CI) and effect size (Cohen's d) for Welch two-samples t-tests.

| Odour   | CI    |      | Cohen's d |
|---------|-------|------|-----------|
| Female  | -0.12 | 0.31 | 0.33      |
| Vanilla | -0.05 | 0.24 | 0.43      |
| Water   | -0.10 | 0.22 | 0.25      |
| Garlic  | -0.05 | 0.21 | 0.39      |
| Rat     | -0.15 | 0.44 | 0.45      |
